# Supplementary material for: Aedes aegypti microRNA miR-2b regulates ubiquitin-related modifier to control chikungunya virus replication
Source: PubMed Central journal article supplement (PMC5732197; doi:10.1038/s41598-017-18043-0), 2017-12-15
Supplement: 41598_2017_18043_MOESM1_ESM.pdf [file 41598_2017_18043_MOESM1_ESM.pdf]

***Aedes aegypti* microRNA miR-2b regulates ubiquitin related modifier to control chikungunya virus replication.**

Sunil Kumar Dubey<sup>1</sup>, Jatin Shrinet<sup>1</sup>, Jaspreet Jain<sup>1</sup>, Shakir Ali<sup>2</sup>, Sujatha Sunil<sup>1\*</sup>

<sup>1</sup> Vector Borne Disease group, International Centre for Genetic Engineering and Biotechnology (ICGEB), Aruna Asaf Ali Marg, New Delhi, India

<sup>2</sup> Department of Biochemistry, Faculty of Science, Jamia Hamdard, New Delhi, India

\*Corresponding author

E-mail : [sujatha@icgeb.res.in](mailto:sujatha@icgeb.res.in) (SS)

## Supplementary Figure S1.

The functional analyses of the targets were carried out by Gene Ontology (GO) terms. GO terms for each of the targets were fetched from VectorBase database using BioMart tool. The terms were visualized using WEGO webtool (**Supplementary Figure S1**). The analysis of GO terms classified the targets into three categories, namely, Biological Process, Molecular Function, and Cellular Component. Amongst Biological Processes, targets of the regulated miRNAs revealed their involvement in cell communication, cell death, cell adhesion, immune system process, metabolic process and response to external stimuli to name few. Similarly, the targets seem to function in activities like catalytic activity, protein binding, signal transducer, electron carrier and translation regulator at the Molecular Function class of GO analysis. Some of the targets were also found to be involved in activities pertaining to the cell, organelles, extracellular regions as well as synapse with respect to the Cellular Components.

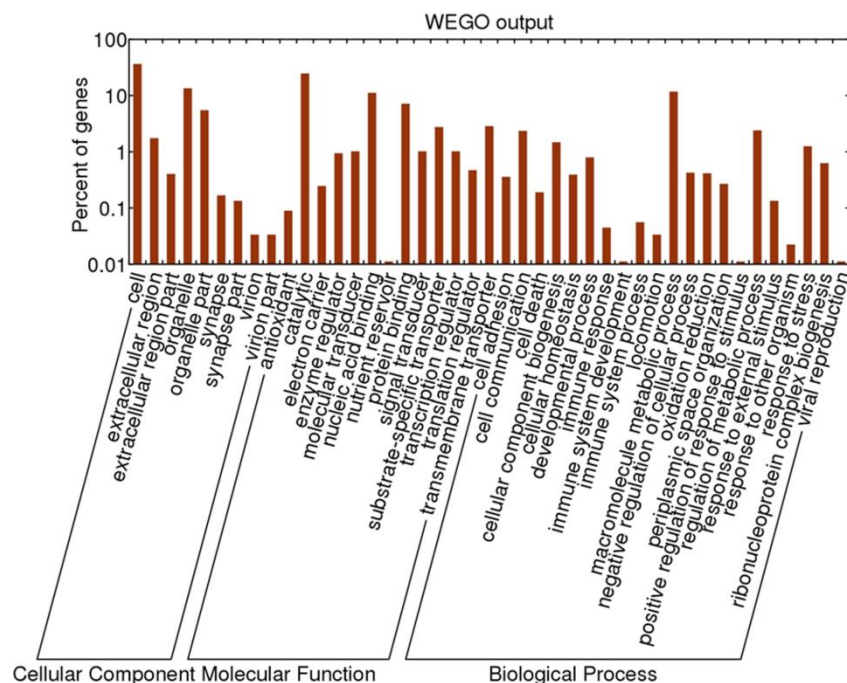

**Supplementary Figure S1.** The figure represents the functional classification of predicted targets of all significant miRNAs on the basis of gene ontology (GO). The targets were classified on the basis of cellular component, molecular function and Biological process.

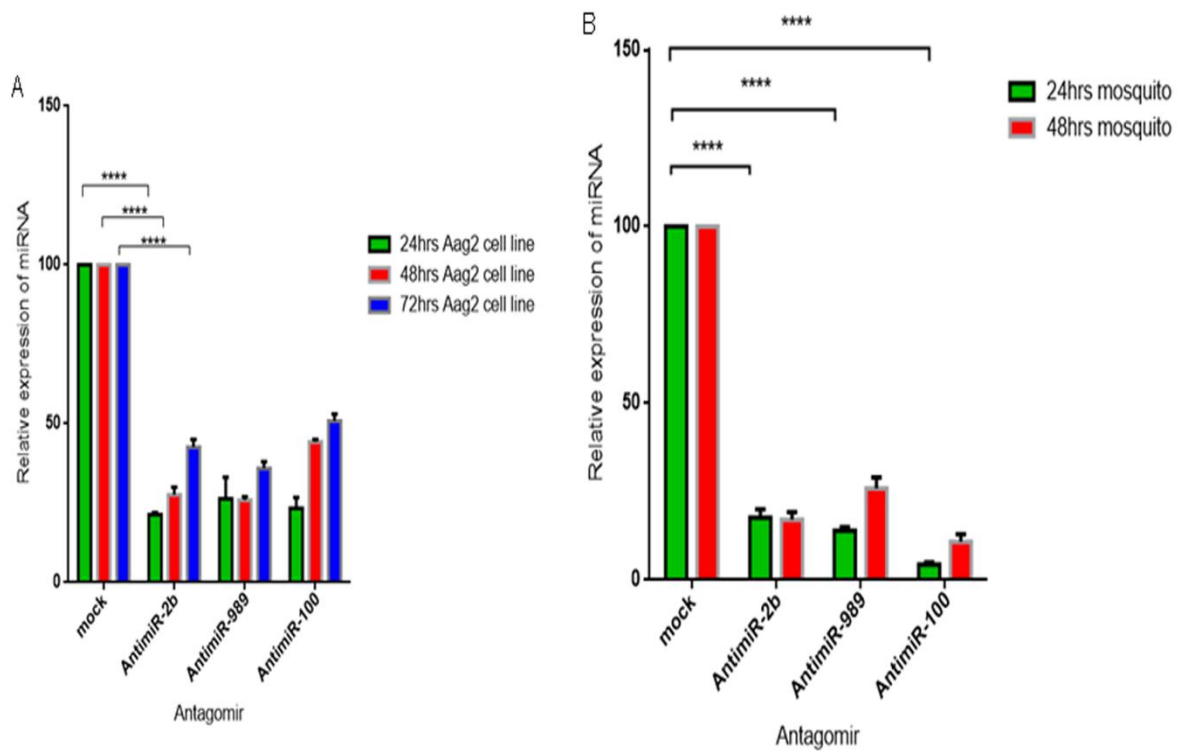

**Supplementary Figure S2. MicroRNA inhibition assay.** (A) To assess the inhibition level and expression of miRNAs after transfection of antagomir for miR-2b, miR-989, miR-100 into Aag2 cell line at different time points of 24hrs, 48hrs and 72hrs post transfection. Data were expressed as mean  $\pm$  SEM, \*\*\*\* $P < 0.0001$ . (B) Expression level of miRNAs in *Aedes aegypti* mosquito at 24hrs and 48hrs of post antagomir injection. Data were expressed as mean  $\pm$  SEM, \*\*\*\* $P < 0.0001$  vs mock group Validation of predicted targets in Aag2 cells.

**Supplementary Table 1. Details of primers.** The table shows the sequences of the qRT-PCR primers synthesised.

| <b>Name</b> | <b>Fwd sequence</b>    | <b>Rev sequence</b>   |
|-------------|------------------------|-----------------------|
| miR-2b      | TATCACAGCCAGCTTTGATG   | Universal             |
| miR-100     | AACCCGTAGATCCGAACTTGTG | Universal             |
| miR-989     | TGTGATGTGACGTAGTGGTAC  | Universal             |
| AAEL008680  | ACGACACCGACTGGGATCTA   | GCCAAGCAACAAGCAGGAAA  |
| AAEL006511  | CGGAAGAGACACGTTGGGAA   | CAGCACCAGATGGAGAGTGG  |
| AAEL011500  | CAGTGTTAGCGTCCTGGTCA   | CGACTGTGCCATCTCCTACC  |
| AAEL015099  | AGCGGGGTTTCAGCTATGTC   | TCCGATGGAATGCCAAACCT  |
| AAEL013539  | TACTGAACACTCACGGCCAC   | GGTGGTCCTTCTTAGGTGCC  |
| AAEL012819  | CGTCTAAAGCAGGCCAAGGA   | TCCGGTGGTCCCAGTTAGAT  |
| 5.8s        | CCCTAGGCAGGGGATCACT    | GGCACTCAAGAATGTGTGCAT |

## Details of small RNA analysis

The reads of Uninfected, 12 h.p.i. and 24 h.p.i. libraries were processed using in-house pipeline. Reads were trimmed and mapped to downloaded miRNAs and other non-coding RNAs. Small RNA processing results are shown in supplementary Table 2.

**Supplementary Table 2.** Table represents the distribution of small RNA reads of all the three libraries.

| S.No | Sample     | Raw reads          | Reads mapped to known miRNAs | Total miRNA identified | tRNA               | rRNA               | snoRNA; CD-box     |
|------|------------|--------------------|------------------------------|------------------------|--------------------|--------------------|--------------------|
| 1.   | Uninfected | $1.07 \times 10^7$ | $3.74 \times 10^5$           | 116                    | $4.70 \times 10^5$ | $1.60 \times 10^6$ | $8.90 \times 10^5$ |
| 2.   | 12 h.p.i.  | $2.97 \times 10^7$ | $1.34 \times 10^6$           | 124                    | $1.54 \times 10^6$ | $5.30 \times 10^6$ | $2.84 \times 10^6$ |
| 3.   | 24 h.p.i.  | $1.26 \times 10^7$ | $6.82 \times 10^5$           | 111                    | $2.43 \times 10^6$ | $6.06 \times 10^6$ | $2.89 \times 10^6$ |

A total of  $5.30 \times 10^7$  reads were present, out of which  $1.07 \times 10^7$  reads were found in uninfected library,  $2.97 \times 10^7$  reads were present in 12 h.p.i. library and  $1.26 \times 10^7$  reads were present in 24 h.p.i. library. A total of 126 known miRNAs were identified in all the libraries taken together, out of which 116 miRNAs were identified in uninfected library whereas 124 and 111 known miRNAs were identified in 12 h.p.i. and 24 h.p.i. libraries respectively (Supplementary Table 3). Out of total 126 miRNAs identified in all the libraries, 106 miRNAs were present in all the three libraries, nine miRNAs namely, miR-2944b-5p, miR-927, miR-2943, miR-281-3p, miR-2944a-3p, miR-316, miR-2944b-3p, miR-309b-3p and miR-2944a-5p were found in both uninfected and in 12 h.p.i. library whereas four miRNAs namely, miR-1175-5p, miR-iab-4-5p, miR-2796 and miR-125-3p were found in both 12 h.p.i. and 24 h.p.i. library. miR-310-5p was identified only in uninfected library and miR-1 was present only in 24 h.p.i. library. Five miRNAs namely, miR-3425, miR-2755-3p, miR-279-5p, miR-981 and miR-929-5p were found to be present only in 12 h.p.i. library.

The identified miRNAs were further classified into four categories based on the abundance of reads as inferred by TPM values of the miRNAs. The categories were (i) significantly abundant (SA) with

TPM  $\geq$  1000 (ii) moderately abundant (MA) with TPM between 100-999 (iii) abundant (A) with TPM between 10-99 and (iv) rare (R) with TPM value  $\leq$  10. The analysis revealed that eight miRNAs of uninfected library were in SA category whereas twelve and eleven miRNAs of 12 h.p.i. and 24 h.p.i. libraries respectively were in SA categories. MA categories consist of twenty three, twenty two and sixteen miRNAs from uninfected, 12 h.p.i. and 24 h.p.i. libraries respectively. Twenty one, twenty three and twenty six miRNAs of uninfected, 12 h.p.i. and 24 h.p.i. libraries respectively were in A category. Most of the miRNAs from all three libraries were found to be present in R category. 64 miRNAs from uninfected library, 67 miRNAs of 12 h.p.i. and 58 miRNAs from 24 h.p.i. libraries were present in rare category. miR-184 was found to be most abundant microRNA present in all the three libraries.

**Supplementary Table 3. Details of miRNAs.** The table shows all the miRNAs identified in the study. TPM values of each of the miRNAs are shown in the table. Symbol “-“ represents that the miRNA was not identified in the respective library.

| <b>miRNA</b> | <b>Uninfected</b> | <b>12h.p.i.</b> | <b>24h.p.i.</b> |
|--------------|-------------------|-----------------|-----------------|
| miR-2b       | 52.57161          | 350.4825        | 230.2844        |
| miR-989      | 243.7834          | 329.3553        | 86.9867         |
| miR-317-5p   | 12.09612          | 14.56699        | 65.79556        |
| miR-71-5p    | 15.63191          | 23.95311        | 58.8531         |
| miR-998-3p   | 150.4572          | 274.6197        | 54.75074        |
| miR-34-3p    | 6.885486          | 9.688899        | 40.1558         |
| miR-278-5p   | 5.76892           | 7.19939         | 30.13657        |
| miR-2951-3p  | 251.2272          | 289.3213        | 13.33267        |
| miR-100      | 172.4163          | 288.6821        | 9.814746        |
| miR-10-5p    | 1.302659          | 15.17255        | 7.810264        |
| miR-2951-5p  | 6.327183          | 0.067284        | 1.89302         |
| miR-2779     | 21.02865          | 17.79662        | 1.262265        |
| miR-285      | 6.699391          | 8.645997        | 0.552241        |
| miR-310-5p   | 0.093047          | -               | -               |
| miR-279-5p   | -                 | 0.33642         | -               |
| miR-929-5p   | -                 | 0.168202        | -               |
| miR-981      | -                 | 0.067284        | -               |
| miR-3425     | -                 | 0.06728         | -               |
| miR-2755-3p  | -                 | 0.033642        | -               |
| miR-316      | 0.744377          | 1.143828        | -               |
| miR-927      | 0.744377          | 1.00926         | -               |
| miR-2943     | 0.465236          | 0.706482        | -               |
| miR-2944a-5p | 0.837424          | 0.605556        | -               |

|              |          |          |          |
|--------------|----------|----------|----------|
| miR-2944b-3p | 0.744377 | 0.50463  | -        |
| miR-281-3p   | 0.093047 | 0.134568 | -        |
| miR-2944a-3p | 0.186094 | 0.100926 | -        |
| miR-2944b-5p | 0.093047 | 0.100926 | -        |
| miR-309b-3p  | 0.279141 | 0.033642 | -        |
| miR-184      | 8398.99  | 11179.85 | 18219.14 |
| miR-2940-3p  | 4491.942 | 5003.105 | 7299.836 |
| bantam-3p    | 3241.761 | 3796.837 | 5689.58  |
| miR-283      | 2809.743 | 3059.976 | 3803.914 |
| miR-11-3p    | 1545.792 | 2155.948 | 2166.52  |
| miR-276-3p   | 2244.017 | 3002.079 | 2159.42  |
| miR-306-5p   | 988.7185 | 1331.921 | 1899.393 |
| miR-14       | 1248.878 | 1663.463 | 1836.122 |
| miR-2940-5p  | 1180.302 | 1619.863 | 1187.712 |
| miR-275-3p   | 955.8729 | 1515.001 | 1041.29  |
| miR-281-5p   | 601.2704 | 818.0391 | 1035.452 |
| miR-317-3p   | 851.6601 | 1045.022 | 836.566  |
| miR-71-3p    | 358.4174 | 476.0681 | 681.623  |
| miR-12-5p    | 230.4777 | 274.7543 | 668.527  |
| miR-2a-3p    | 457.9778 | 512.166  | 614.8019 |
| miR-92b-3p   | 474.7263 | 669.8124 | 578.9851 |
| miR-305-5p   | 718.5097 | 1022.448 | 573.226  |
| miR-8-3p     | 516.1323 | 557.6163 | 549.4797 |
| miR-13-3p    | 450.5341 | 642.7979 | 462.6201 |
| miR-996      | 151.2946 | 194.1817 | 206.1436 |
| miR-279-3p   | 176.5104 | 262.7441 | 195.9666 |
| miR-1889-5p  | 359.8131 | 627.7599 | 191.6276 |
| miR-970-3p   | 136.5001 | 219.9515 | 183.5806 |
| miR-282-5p   | 198.9347 | 290.6333 | 171.1947 |
| miR-252-5p   | 133.8948 | 186.0403 | 137.5869 |
| miR-9c-5p    | 187.3969 | 196.1329 | 109.2648 |
| miR-12-3p    | 24.93662 | 37.91455 | 74.31584 |
| miR-87       | 101.1422 | 158.7567 | 70.68683 |
| miR-9c-3p    | 92.30273 | 125.4511 | 61.92987 |
| miR-34-5p    | 34.33438 | 52.04419 | 53.40958 |
| miR-277-3p   | 42.42948 | 48.04079 | 47.17715 |
| miR-92a-3p   | 78.25261 | 131.8767 | 46.94048 |
| miR-305-3p   | 40.2894  | 66.03927 | 44.65262 |
| miR-278-3p   | 38.42845 | 56.2158  | 36.21122 |
| miR-190-5p   | 25.30881 | 30.14324 | 36.13233 |
| miR-2765     | 32.0082  | 52.68339 | 27.61204 |
| miR-9b       | 54.33951 | 60.08463 | 21.61629 |
| miR-79-3p    | 30.70554 | 47.73801 | 20.90626 |
| miR-33       | 16.37629 | 20.08428 | 20.90626 |

|             |          |          |          |
|-------------|----------|----------|----------|
| miR-1889-3p | 9.118616 | 8.545071 | 17.98727 |
| miR-988-3p  | 8.65338  | 10.76544 | 17.35614 |
| miR-13-5p   | 18.23723 | 21.76638 | 16.17277 |
| miR-2945-3p | 11.91003 | 25.56793 | 15.38385 |
| miR-8-5p    | 6.978533 | 12.24569 | 15.30496 |
| miR-308-3p  | 6.606344 | 5.550932 | 11.36038 |
| bantam-5p   | 2.698366 | 2.859571 | 8.756963 |
| miR-308-5p  | 1.860942 | 2.321299 | 7.415806 |
| miR-1890    | 7.164627 | 8.982417 | 5.6013   |
| let-7-5p    | 10.70042 | 18.43582 | 4.891276 |
| miR-306-3p  | 0.372188 | 0.302778 | 4.496819 |
| miR-965     | 7.07158  | 10.3281  | 3.55012  |
| miR-282-3p  | 4.931496 | 5.920994 | 3.313445 |
| miR-11-5p   | 2.791413 | 3.566053 | 3.313445 |
| miR-276-5p  | 2.605319 | 3.633337 | 2.997879 |
| miR-275-5p  | 12.74745 | 24.12132 | 2.761204 |
| miR-2941    | 5.489779 | 5.51729  | 2.761204 |
| miR-2946    | 3.907978 | 4.709882 | 2.366747 |
| miR-137-3p  | 4.094072 | 10.05896 | 2.208964 |
| miR-210-3p  | 1.209612 | 2.893213 | 2.130072 |
| miR-1175-3p | 2.512272 | 6.627476 | 2.05118  |
| miR-998-5p  | 2.419225 | 3.162349 | 1.7356   |
| miR-252-3p  | 0.744377 | 1.547533 | 1.49894  |
| miR-263a-3p | 0.744377 | 1.17747  | 1.49894  |
| miR-92a-5p  | 1.581801 | 1.850311 | 1.341156 |
| miR-988-5p  | 0.279141 | 0.437346 | 1.183373 |
| miR-932-5p  | 6.234156 | 8.679639 | 1.02559  |
| miR-957     | 0.372188 | 1.042902 | 0.946699 |
| miR-133     | 0.279141 | 0.67284  | 0.631132 |
| miR-1000    | 0.558283 | 0.639198 | 0.631132 |
| miR-277-5p  | 0.279141 | 0.134568 | 0.631132 |
| miR-375     | 4.18712  | 6.963896 | 0.552241 |
| miR-92b-5p  | 1.860942 | 2.354941 | 0.473349 |
| miR-980-3p  | 2.419225 | 2.153089 | 0.473349 |
| miR-125-5p  | 1.116565 | 1.412964 | 0.394458 |
| miR-190-3p  | 0.744377 | 0.975618 | 0.394458 |
| miR-79-5p   | 0.65133  | 0.740124 | 0.394458 |
| miR-2945-5p | 0.279141 | 0.235494 | 0.394458 |
| miR-980-5p  | 2.23313  | 2.893213 | 0.236675 |
| miR-2a-5p   | 0.372188 | 0.908334 | 0.236675 |
| miR-9a      | 0.558283 | 0.571914 | 0.236675 |
| miR-1175-5p | -        | 0.4037   | 0.236675 |
| miR-1891    | 0.186094 | 0.16821  | 0.236675 |
| miR-263a-5p | 0.093047 | 0.16821  | 0.157784 |



|              |          |          |          |
|--------------|----------|----------|----------|
| miR-315-5p   | 1.023518 | 1.110186 | 0.157783 |
| miR-2942     | 1.581801 | 1.076544 | 0.157783 |
| miR-219      | 0.558283 | 0.403704 | 0.157783 |
| miR-210-5p   | 0.279141 | 0.100926 | 0.157783 |
| miR-1        | -        | -        | 0.078892 |
| miR-307      | 1.488754 | 2.220373 | 0.078892 |
| miR-263b-5p  | 0.558283 | 0.84105  | 0.078892 |
| miR-2c-3p    | 5.675873 | 0.740124 | 0.078892 |
| miR-1174     | 0.465236 | 0.403704 | 0.078892 |
| miR-2796     | -        | 0.33642  | 0.078892 |
| miR-286b     | 0.186094 | 0.269136 | 0.078892 |
| miR-31       | 0.65133  | 0.235494 | 0.078892 |
| miR-286a     | 0.186094 | 0.201852 | 0.078892 |
| miR-125-3p   | -        | 0.0672   | 0.078892 |
| miR-iab-4-5p | -        | 0.033642 | 0.078892 |
